# Supplementary material for: Salt gradient driven ion transport in solid-state nanopores: the crucial role of reservoir geometry and size
Source: Royal Society of Chemistry journal article supplement (doi:10.1039/c6cp06459k), 2016-01-01
Supplement: c6cp06459k1.pdf [file c6cp06459k1.pdf]

## Electronic Supplementary Information (ESI)

### **Salt Gradient Driven Ion Transport in Solid-State Nanopores: The Crucial Role of Reservoir Geometry and Size**

Chih-Yuan Lin,<sup>1,+</sup> Fu Chen,<sup>2,+</sup> Li-Hsien Yeh,<sup>2,\*</sup> Jyh-Ping Hsu,<sup>1,\*</sup>

<sup>1</sup>Department of Chemical Engineering, National Taiwan University, Taipei 10617, Taiwan

<sup>2</sup>Department of Chemical and Materials Engineering, National Yunlin University of Science and Technology, Yunlin 64002, Taiwan

+ These two authors contributed equally to this work

\* Corresponding authors:

Fax: +886-5-5312071; E-mail: [lhyeh@yuntech.edu.tw](mailto:lhyeh@yuntech.edu.tw) (Li-Hsien Yeh),

[jphsu@ntu.edu.tw](mailto:jphsu@ntu.edu.tw) (Jyh-Ping Hsu)

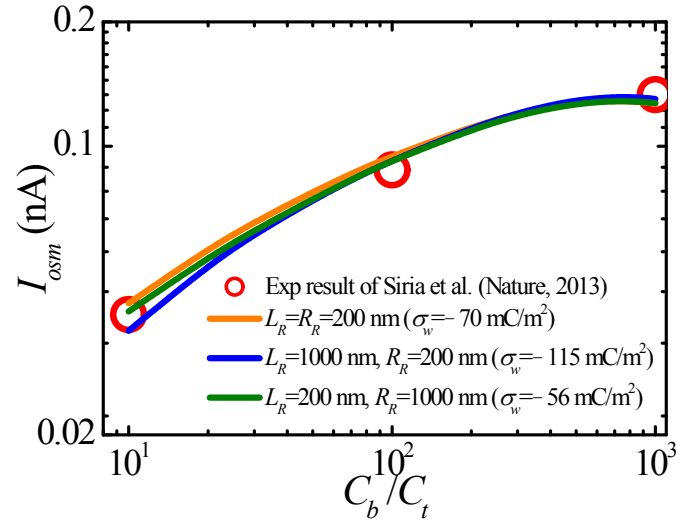

**Fig. S1.** Dependence of the osmotic current  $I_{osm}$  on the bulk salt concentration ratio  $C_b / C_t$  at  $R_N = 40$  nm,  $L_N = 1250$  nm, and  $C_t = 1$  mM. Open circles: experimental data of Siria et al.<sup>1</sup> at pH 5.5. Curves: present results under various conditions.

## Reference

1. A. Siria, P. Poncharal, A. L. Biance, R. Fulcrand, X. Blase, S. T. Purcell and L. Bocquet, *Nature*, 2013, **494**, 455-458.
